# Supplementary material for: Augmented Pulmonary Responses to Acute Ozone Exposure in Obese Mice: Roles of TNFR2 and IL-13
Source: PubMed Central journal article supplement (PMC3673194; doi:10.1289/ehp.1205880), 2013-02-22
Supplement: ehp.1205880.s001.pdf [file ehp.1205880.s001.pdf]

**Supplemental O c v g t k n**

**Augmented Pulmonary Responses to Acute Ozone Exposure in Obese Mice:**

**Roles of TNFR2 and IL-13**

Alison Suzanne Williams, Joel Andrew Mathews, David Itiro Kasahara, Lucas Chen, Allison  
Patricia Wurmbrand, Huiqing Si, and Stephanie Ann Shore

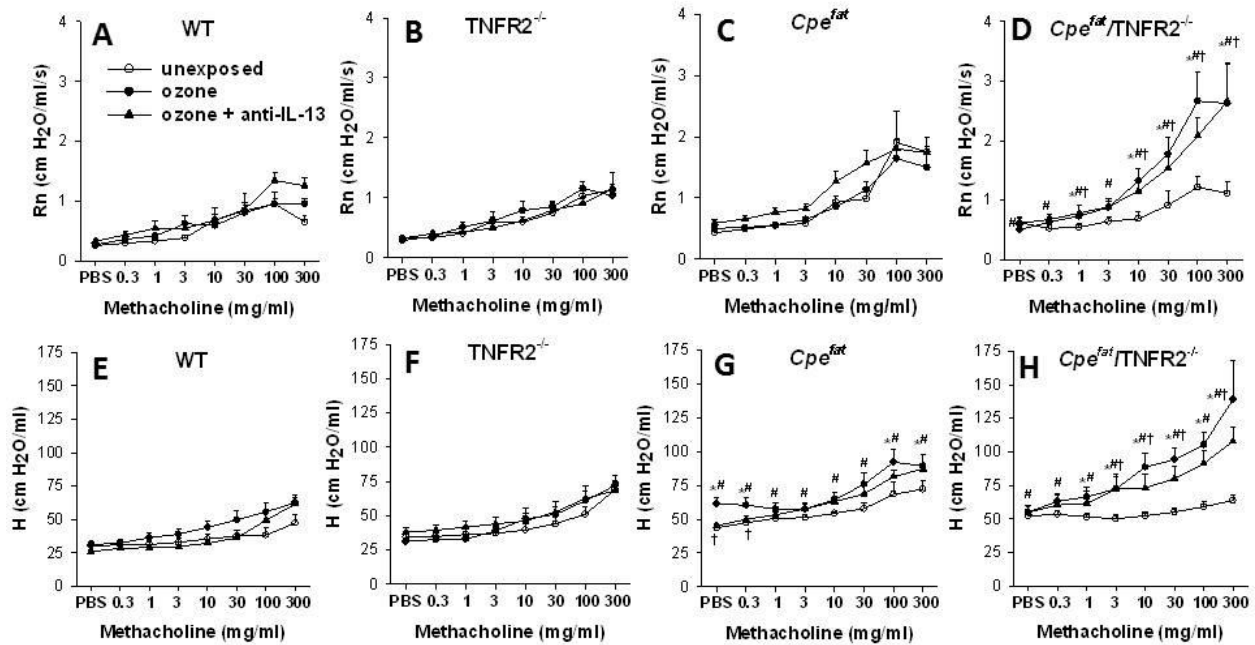

**Supplemental Material, Figure S1** Airway responsiveness in mice that were unexposed, exposed to ozone, or treated with anti-IL-13 24 h prior to ozone exposure. Shown are methacholine induced changes in Rn (A-D), which largely reflects the conducting airways, and the coefficient of lung tissue elastance (H) (E-H), which reflects changes in the small airways and pulmonary parenchyma, including airway closure. Results are mean  $\pm$  SE of data from 6-9 mice per group. \*  $p < 0.05$  for ozone exposed versus unexposed genotype-matched lean mice. #  $p < 0.05$  versus TNFR2 genotype matched lean mice with the same exposure; †  $p < 0.05$  versus obesity-matched TNFR2 sufficient mice with the same ozone exposure; &  $p < 0.05$  versus ozone exposed genotype matched mice not treated with anti-IL-13.

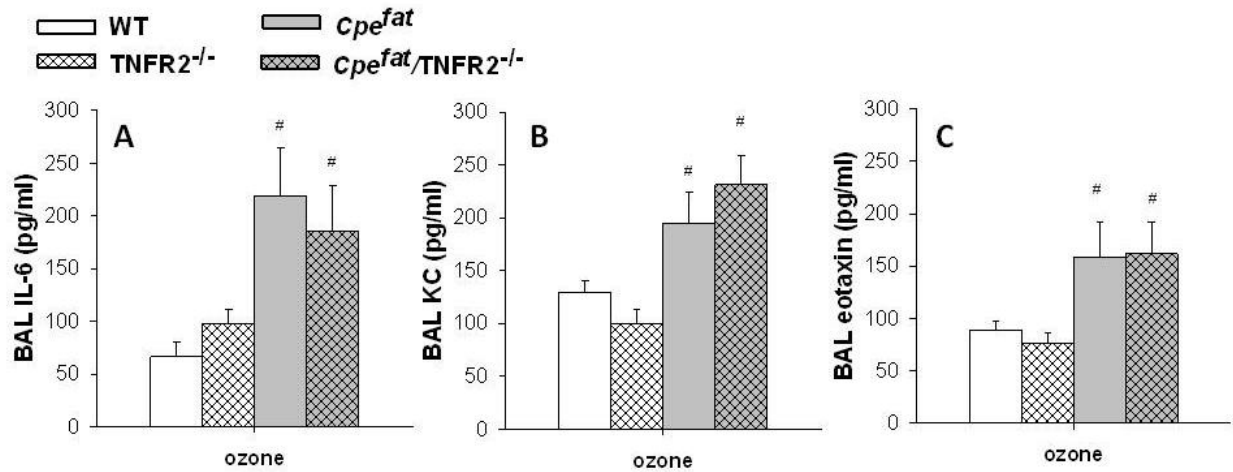

**Supplemental Material, Figure S2:** Bronchoalveolar lavage (BAL) IL-6 (A), KC (B), and eotaxin (C) in WT, TNFR2<sup>-/-</sup>, *Cpe<sup>fat</sup>*, and *Cpe<sup>fat</sup>/TNFR2<sup>-/-</sup>* mice that were exposed to ozone (2 ppm for 3 h) and studied 4 h after cessation of exposure. We measured IL-6, KC, and eotaxin 4h rather than 24 h after cessation of ozone exposure, because these cytokines/chemokines peak at 4h and then decline towards unexposed values by 24 h. Results are mean  $\pm$  SE of data from 5-11 mice per group. # $p < 0.05$  versus ozone exposed and TNFR2 genotype matched lean mice.
